# Supplementary material for: Preparation of a Pt/TiO2/cotton fiber composite catalyst with low air resistance for efficient formaldehyde oxidation at room temperature
Source: Royal Society of Chemistry journal article supplement (doi:10.1039/c7ra01616f), 2017-01-01
Supplement: c7ra01616f1.pdf [file c7ra01616f1.pdf]

**Supporting Information:**

**Preparation of Pt/TiO<sub>2</sub>/Cotton Fiber Composite Catalyst with Low Air  
Resistance for Efficient Formaldehyde Oxidation at Room Temperature**

Longhui Nie<sup>a\*</sup>, Jie Wang<sup>a</sup>, Jiagu Yu<sup>b\*</sup>

<sup>a</sup> *School of Materials and Chemical Engineering, Hubei University of Technology,  
Wuhan 430068, China.*

<sup>b</sup> *State Key Laboratory of Advanced Technology for Materials Synthesis and  
Processing, Wuhan University of Technology, Wuhan 430070, China.*

E-mails: nielonghui@mail.hbut.edu.cn (L. Nie); jiaguoyu@yahoo.com (J. Yu).

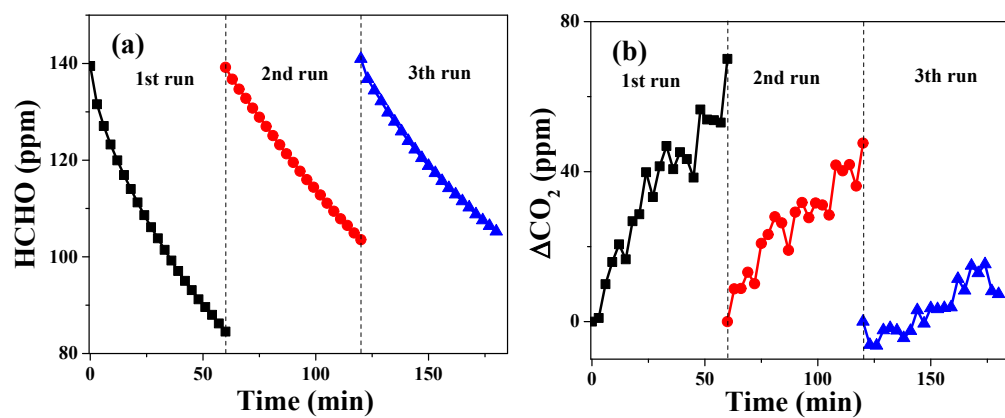

**Fig. S1** Changes in formaldehyde concentration (a) and  $\Delta\text{CO}_2$  (b) as a function of reaction time for the PC0.5 sample (Here, the initial HCHO concentration is about 140 ppm.).
